# Supplementary material
Source: PubMed Central journal article supplement (PMC3592137)
Supplement: JVI.02939-12_zjv999097373so1.pdf [file JVI.02939-12_zjv999097373so1.pdf]

## Supplemental material

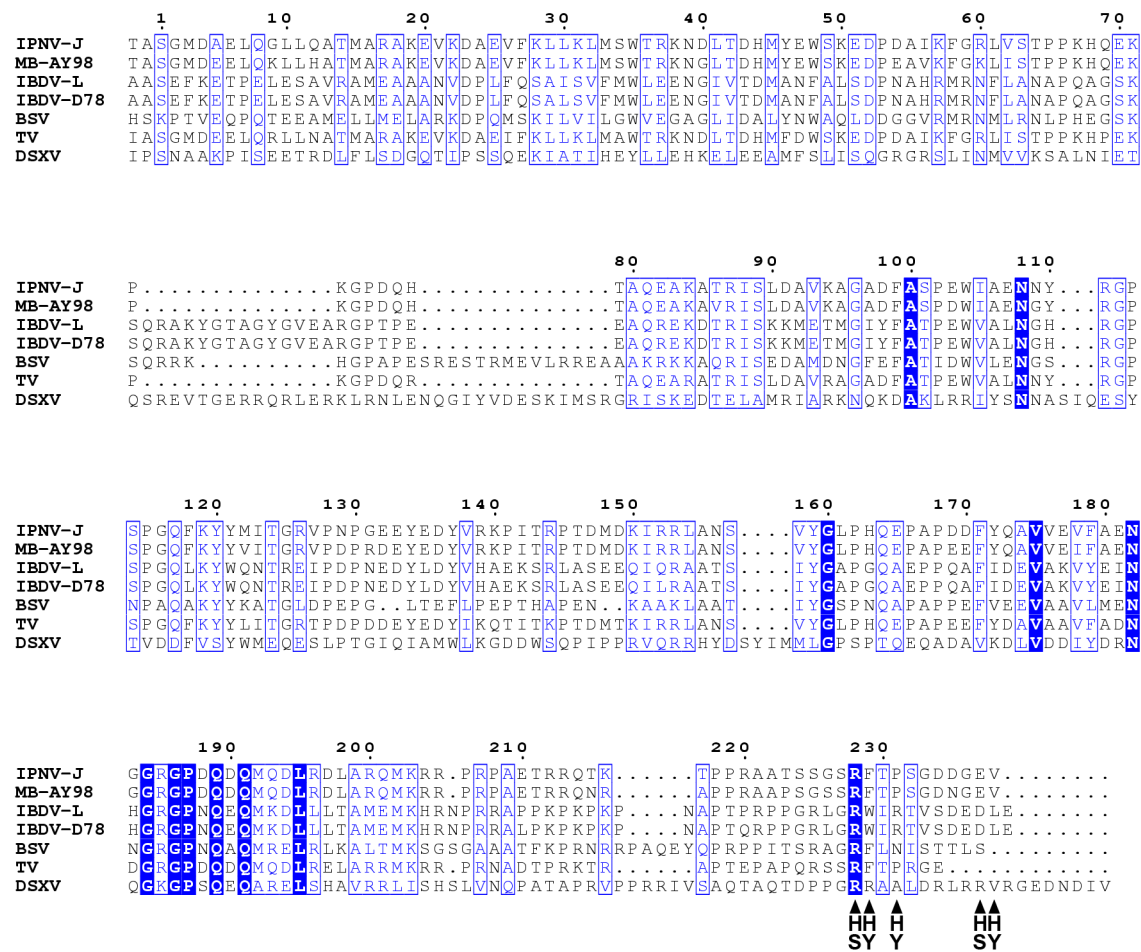

**Fig. S1. Birnavirus VP3 sequence alignment.** Selected birnavirus VP3 sequences are shown as follows (UniProt IDs in parentheses): IPNV-J, Infectious Pancreatic Necrosis virus strain Jasper (P05844); MB-AY98, Marine Birnavirus isolated from *Plecoglossus altivelis* (Q7TLB5); IBDV-L, Infectious Bursal Disease virus strain Lurket (Q49HH5); IBDV-D78, IBDV strain D78 (Q77DJ3); BSV, Blotched Snakehead virus (Q8AZM0); TV, Tellina virus (Q990P7); DSXV, Drosophila X virus (Q96724). Numbering along the top of the alignment is for IPNV-J. Strictly conserved residues are shaded blue with white face, and moderately conserved residues are boxed with blue face. VP3 residues that bind VP1 are marked with a black triangle and labelled according to their interaction mode (H, Hydrogen bond; S, Salt-bridge; Y, Hydrophobic interaction). Note the conservation of R228 that interacts with VP1.

1 10 20 30 40 50 60

IPNV-J MSDIFNSPQNKA SILTALMKSTIG..DVEDVLI PKR.FRPAKDPDLSPPAAQFLKDNKYRIILRRRAIPT  
 MB-AY98 MSDIFNSPQNKA SILSALMKSTAG..DVEDVLI PKR.FRPAKDPDLSPPAAQFLKDNKYRIILRRRAIPT  
 IBDV-D78 MSDIFNSPQARS TISAAGIKPTAGQDVEELLI PKV.WVPPEPLASPSRLAKFLRENGYKVLQPRSLPE  
 IBDV-L MSDIFNSPQARS KISAAGIKPTAGQDVEELLI PKV.WVPPEPLASPSRLAKFLRENGYKVLQPRSLPE  
 BSV MSDVFNTPHARR TITQALGLTNVS.DRTQDWLLPEP.WNPPMDPIKNSQEAAYLQRNQYRMLKPRRAIPE  
 TV1 MSNVFNSSQYRD TVLKKILGKKNAPSTSDPKSHFPRQ.FTYDHDKIN.AKYIAELVVRHNLKPRRIEIVINE  
 DSXV MSDIFNQQLKKS FSNIVKNEGQDSDIREVFNELARPQAEVGRDIEYSELSQALNDNSVKVFRPQFYDE

70 80 90 100 110 120 130

IPNV-J MVELETDAALPRLRQM..VEDGKLKD..TVSVPEGETTAFY PKYVBFHKKPDHDEVGTFGAPDITLTKQLTF  
 MB-AY98 MVELETDAALPRLRQM..VDDGKLKD..TVSVPEGETTAFY PKYVBFHKKPDHDEVGTFGAPDITLTKQLTF  
 IBDV-D78 NEEYETDQILPDLAWMRQIEGAVLKP..TLSLPIGDQYEF PKYVBFHRRPSKEKPNAY.FPDIALKQLQMIY  
 IBDV-L NEEYETDQILPDLAWMRQIEGAVLKP..TLSLPIGDQYEF PKYVBFHRRPSKEKPNAY.FPDIALKQLQMIY  
 BSV NTPLDTSLELPHLAEF..VGSGAFGT..STLVPAGSTEYI PRYVBFHRRPSKEKPNAY.FPDIALKQLQMIY  
 TV1 LVKEDPFDFFPFNTDFEETEFNADPPDTVEIPQGTSHFI PKYVBFHRRPSKEKPNAY.FPDIALKQLQMIY  
 DSXV LVNPFPIEAAASP RMMALYGELLDSKD...VSLPVGSGLHI PTYKBFHRRPSKEKPNAY.FPDIALKQLQMIY

140 150 160 170 180 190

IPNV-J FLLEN.DFPITG.PETTLRQVREAIATLQYGSYSYSQQLNRLLAMKGVATGRNPNKTPKTVGYTN...EQLA  
 MB-AY98 FLLEN.DFPITG.PETTLRQVREAIATLQYGSYSYSQQLNRLLAMKGVATGRNPNKTPKTVGYTN...EQLA  
 IBDV-D78 LFLQVPEANGLKDEVTLLTQNIIRDKAYGSGTYMGQATRLVAMKEVATGRNPNKDPKLGYTF...ESIA  
 IBDV-L LFLQVPEANGLKDEVTLLTQNIIRDKAYGSGTYMGQATRLVAMKEVATGRNPNKDPKLGYTF...ESIA  
 BSV QLTNGKDNPEEGGTFRQFRDITVEQQYGSYSYSQQLARLVAMKEVATGRNPNKSPKELGLSM...EELIA  
 TV1 HLLVSVDSDEN.TATMQHLLRAAKTCAYNGSIKGMTTRLEKMRREIADGIGKNKPRPIYSMGYGTLEVS  
 DSXV SANDTWDKQITY..ETLKELLVAQATNRFSTGSLLGQVRRVAAQDVAYGRKGHHKNSFKEMGTPYRV

200 210 220 230 240 250 260

IPNV-J KLLLEQTLPINIPKHEDEP...DLRWAPSWLTYTGDLSIDKS...YLPHVTIKSSAGLIFYIGKTIGDITAE  
 MB-AY98 KLLLEQTLPINIPKHEDEP...DLRWAPSWLTYTGDLSIDKS...YLPHVTIKSSAGLIFYIGKTIGDITAE  
 IBDV-D78 KLLLEQTLPINIPKHEDEP...DLRWAPSWLTYTGDLSIDKS...YLPHVTIKSSAGLIFYIGKTIGDITAE  
 IBDV-L KLLLEQTLPINIPKHEDEP...DLRWAPSWLTYTGDLSIDKS...YLPHVTIKSSAGLIFYIGKTIGDITAE  
 BSV KLLLEQTLPINIPKHEDEP...DLRWAPSWLTYTGDLSIDKS...YLPHVTIKSSAGLIFYIGKTIGDITAE  
 TV1 KLLLEQTLPINIPKHEDEP...DLRWAPSWLTYTGDLSIDKS...YLPHVTIKSSAGLIFYIGKTIGDITAE  
 DSXV KLLLEQTLPINIPKHEDEP...DLRWAPSWLTYTGDLSIDKS...YLPHVTIKSSAGLIFYIGKTIGDITAE

270 280 290 300

IPNV-J ALVLAADSFIRDLG.....RAATSADPEAGVKKITITDFWYLSLSCGLL  
 MB-AY98 ALVLAADSFIRDLG.....RAATSADPEAGVKKITITDFWYLSLSCGLL  
 IBDV-D78 MIAISNQFLRELSTLLKQ.....GAGTKGSNKKLLSMLSDYWYLSLSCGLL  
 IBDV-L MIAISNQFLRELSTLLKQ.....GAGTKGSNKKLLSMLSDYWYLSLSCGLL  
 BSV ALAICDFTLREVESECVKE.....GA..MASDNQKLLQKLQDYWYLSLSCGLL  
 TV1 DAIFSGDMFLQGVSTALT.....GIDDESTDKLLKEVLADFGLWLRIGYL  
 DSXV ALITANMLIKDVSQLLKENLFTGSNNPLDPKKEGVAEVTTKNPRAAADQFSRQVLDRIIKEYSYTMMGLL

310 320 330 340 350 360 370

IPNV-J FPKGERYTQVDWDKKTNRNIWSAPYPTHLLLSMVSTPVMNE SKLNTITNTQ.TP.SLYGFSFPHGGMDRIMTI  
 MB-AY98 FPKGERYTQVDWDKKTNRNIWSAPYPTHLLLSMVSTPVMNE SKLNTITNTQ.TP.SLYGFSFPHGGMDRIMTI  
 IBDV-D78 FPKAERYDKSTWLTKTRNIWSAPSPTHLMISMITWPVMSNSPNNVLNIEGCP.SLYKFNPFRRGGLNRIVEW  
 IBDV-L FPKAERYDKSTWLTKTRNIWSAPSPTHLMISMITWPVMSNSPNNVLNIEGCP.SLYKFNPFRRGGLNRIVEW  
 BSV FPKAERYDKSTWLTKTRNIWSAPSPTHLMISMITWPVMSNSPNNVLNIEGCP.SLYKFNPFRRGGLNRIVEW  
 TV1 FPKAERYDKSTWLTKTRNIWSAPSPTHLMISMITWPVMSNSPNNVLNIEGCP.SLYKFNPFRRGGLNRIVEW  
 DSXV FPKGERYTQVDWDKKTNRNIWSAPYPTHLLLSMVSTPVMNE SKLNTITNTQ.TP.SLYGFSFPHGGMDRIMTI

380 390 400 410 420 430

IPNV-J IRDSLNDNEDLVMIYADNIYILQDN...TWYSIDLEBKGEANCTPQHMQAMMYLLTRGWTNEDGSPRY  
 MB-AY98 IRDSLNDNEDLVMIYADNIYILQDN...TWYSIDLEBKGEANCTPQHMQAMMYLLTRGWTNEDGSPRY  
 IBDV-D78 ILA...PEEPKALVYADNIYIVHSN...TWYSIDLEBKGEANCTPQHMQAMMYLLTRGWS.DNGDPMF  
 IBDV-L ILA...PEEPKALVYADNIYIVHSN...TWYSIDLEBKGEANCTPQHMQAMMYLLTRGWS.DNGDPMF  
 BSV ILA...PEEPKALVYADNIYIVHSN...TWYSIDLEBKGEANCTPQHMQAMMYLLTRGWS.DNGDPMF  
 TV1 ILA...PEEPKALVYADNIYIVHSN...TWYSIDLEBKGEANCTPQHMQAMMYLLTRGWS.DNGDPMF  
 DSXV ILA...PEEPKALVYADNIYIVHSN...TWYSIDLEBKGEANCTPQHMQAMMYLLTRGWS.DNGDPMF

440 450 460 470 480 490

IPNV-J NPTWATFAMNVAPSMVVDSSCLLMNLQIKTYGQGSNGAF TFLNNHLMSTIVVAEWKAGKP  
 MB-AY98 NPTWATFAMNVAPSMVVDSSCLLMNLQIKTYGQGSNGAF TFLNNHLMSTIVVAEWKAGKP  
 IBDV-D78 NPTWATFAMNVAPSMVVDSSCLLMNLQIKTYGQGSNGAF TFLNNHLMSTIVVAEWKAGKP  
 IBDV-L NPTWATFAMNVAPSMVVDSSCLLMNLQIKTYGQGSNGAF TFLNNHLMSTIVVAEWKAGKP  
 BSV NPTWATFAMNVAPSMVVDSSCLLMNLQIKTYGQGSNGAF TFLNNHLMSTIVVAEWKAGKP  
 TV1 NPTWATFAMNVAPSMVVDSSCLLMNLQIKTYGQGSNGAF TFLNNHLMSTIVVAEWKAGKP  
 DSXV NPTWATFAMNVAPSMVVDSSCLLMNLQIKTYGQGSNGAF TFLNNHLMSTIVVAEWKAGKP

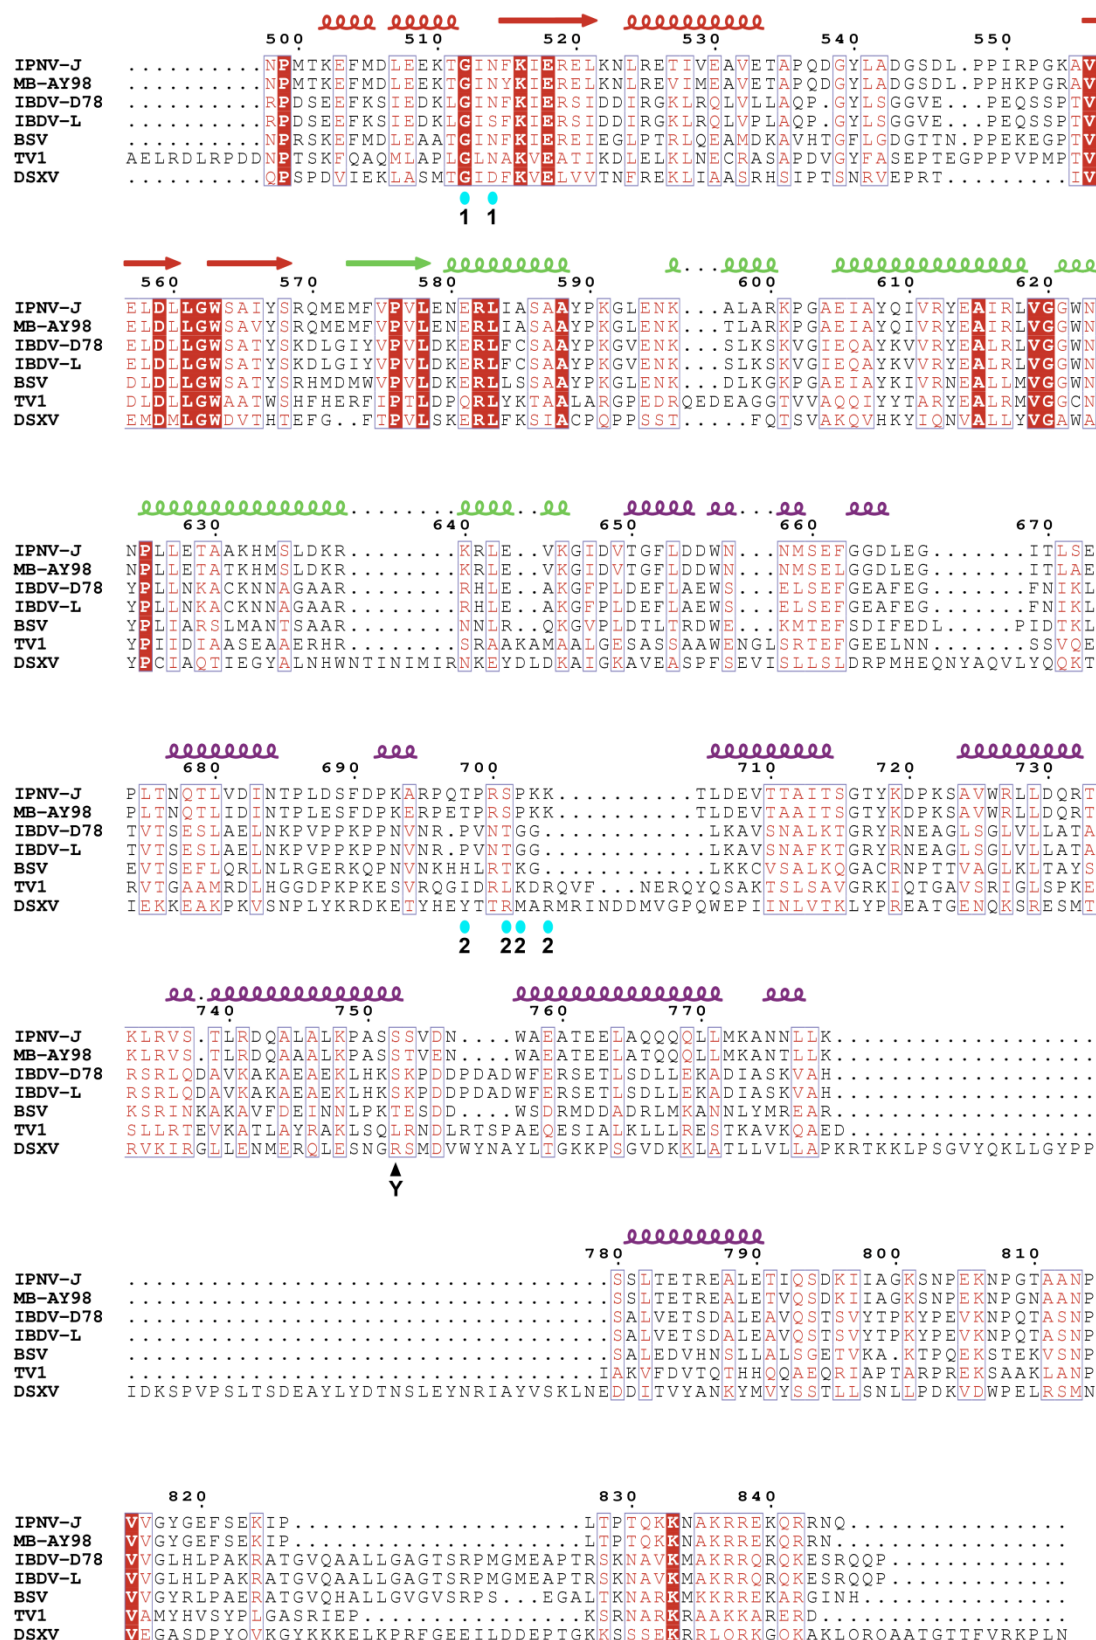

**Fig. S2. Birnavirus VP1 sequence alignment.** Selected birnavirus VP1 sequences are shown as follows (UniProt IDs in parentheses): IPNV-J, Infectious Pancreatic Necrosis virus strain

Jasper (P22173); MB-AY98, Marine Birnavirus isolated from *Plecoglossus altivelis* (Q7T8V1); IBDV-D78, Infectious Bursal Disease virus strain D78 (Q9Q6Q5); IBDV-L, IBDV strain Lurket (Q49HH7); BSV, Blotched Snakehead virus (Q8AZL8); TV1, Tellina virus 1 (Q2PBR4); DSXV, Drosophila X virus (Q91CD5). Numbering along the top of the alignment is for the IPNV strain Jasper VP1 sequence. Strictly conserved residues are shaded red with white face, and moderately conserved residues are boxed with red face. Secondary structure elements for the VP1 structure are shown along the top of the alignment as spirals ( $\alpha$  helices) and arrows ( $\beta$  strands), and are coloured by domain as in Fig. 1C. VP1 residues that bind to the VP3 peptide are marked with a black triangle and labelled according to their interaction mode (H, Hydrogen bond; S, Salt-bridge; Y, Hydrophobic interaction). Residues that form the  $K^+$  ion binding sites are marked with a cyan circle and are grouped “1” or “2” depending on their position in  $K^+$ -binding site 1 or site 2, respectively.

**Table S1. Image densitometry analysis of IPNV VP1:VP3 catalyzed RNA synthesis (normalized against IPNV VP1 reaction).**

| Molar ratio of VP3 | Total lane | Unbound dsRNA product | RNA:protein complex |
|--------------------|------------|-----------------------|---------------------|
| 0                  | 100.0 %    | 100.0 %               | 100.0 %             |
| 0.1                | 98.0 %     | 96.5 %                | 80.3 %              |
| 0.2                | 97.4 %     | 91.6 %                | 78.8 %              |
| 0.5                | 96.4 %     | 92.5 %                | 50.2 %              |
| 0.7                | 94.1 %     | 81.7 %                | 120.3 %             |
| 1.0                | 95.4 %     | 69.6 %                | 236.5 %             |
| 1.5                | 117.8 %    | 49.2 %                | 736.3 %             |
| 2.0                | 116.4 %    | 39.5 %                | 739.2 %             |
| 3.0                | 117.6 %    | 35.6 %                | 980.5 %             |
| 5.0                | 108.2 %    | 33.6 %                | 965.7 %             |
| 10                 | 114.2 %    | 38.1 %                | 706.3 %             |
| 50                 | 68.6 %     | 18.6 %                | 3423.8 %            |

The quantification data is from one representative experiment out of three independent repeats.

**IPNV VP3 synthetic gene nucleotide sequence (synthesised by Geneart).**

GGTACCACCGCAAGCGGTATGGATGCAGAACTGCAGGGTCTGCTGCAGGCAACCATGGCA  
CGTGCAAAAGAAGTTAAAGACGCCGAAGTGTTTAAACTGCTGAAACTGATGAGCTGGACC  
CGTAAAAATGATCTGACCGATCATATGTATGAATGGTCTAAAGAAGATCCGGACGCCATT  
AAATTTGGTCGTCTGGTTAGCACCCCTCCGAAACATCAGGAAAAACCGAAAGGTCCGGAT  
CAGCATAACCGCACAGGAAGCAAAAGCAACCCGTATTAGCCTGGATGCAGTTAAAGCCGGT  
GCAGATTTTGCATCTCCGGAATGGATTGCCGAAAATAATTATCGTGGTCCGTCCCCTGGT  
CAGTTTAAATATTATATGATTACCGGTCGTGTTCCGAATCCGGGTGAAGAATATGAAGAT  
TATGTGCGTAAACCGATTACCCGTCCGACCGATATGGACAAAATTCGTCTGTCTGGCCAAT  
AGCGTTTATGGTCTGCCGCATCAGGAACCGGCACCGGACGATTTTTATCAGGCCGTGGTT  
GAAGTTTTTGCAGAAAATGGTGGTCGTGGTCCGGATCAGGATCAGATGCAGGATCTGCGT  
GATCTGGCACGTCAGATGAAACGTCGTCCGCGTCCGGCAGAAACCCGTCTGCAGACCAAA  
ACACCTCCGCGTGCAGCAACCAGCAGCGGTAGCCGTTTTACCCGAGCGGTGATGATGGT  
GAAGTTGAGCTC
